# Supplementary material for: Functional Characterization of Eight Zinc Finger Motif-Containing Proteins in Toxoplasma gondii Type I RH Strain Using the CRISPR-Cas9 System
Source: MDPI journal article supplement (doi:10.3390/pathogens12101232), 2023-10-11
Supplement: s1 [file s1]

**Table S1: Primers used in the construction of the epitope-tagging strains.**

| Gene          | sgRNA                | HR-primers (5'-3')                                                                                         | KO-primers (5'-3')                                                   |
|---------------|----------------------|------------------------------------------------------------------------------------------------------------|----------------------------------------------------------------------|
| TGME49_285190 | GGCTGTCGACAGCAGTGAAG | Forward:CGGCGCGGCTTCGACGGTCGGGAAGACGGCTGTCGACAGCAG<br>Reverse:AGGACCGCCACAGGGACCGGCGGAGAAAACCTTTTCACCGCTT  | Forward:CTTCATCGCCGCCCTTCTTCG<br>Reverse:CCACAACAACAGGACCGCCACA      |
| TGME49_248270 | GCTCGCGGCTAGGAGCCCAT | Forward:GGCGCCGCAGGGGGCGCTGGGGCTGAGACGCCCCGCTCGCGGC<br>Reverse:CGGCTCCCCTCTCGTGGACAACCTGGGACTTTGCCCTCCAATG | Forward:CCTGGGGCACGAACGAGGAG<br>Reverse:GGAAACGAGTCGGACGGTTATTGA     |
| TGME49_260870 | ACCGTCCACCCCGCAGTCG  | Forward:TCTGACGTTGCGACCGCCACCCCTCTCTGCTCGCTACAGCCTC<br>Reverse:TGGAGGGAGGAAGCATTTTGCCGCTTGTTCTGTTCTCCTCGA  | Forward:TGGATTTTCCTGCCTTTTCGCTCTG<br>Reverse:GCATTTTGCCGCTTGTTCTGTTG |
| TGME49_255310 | GCAACAGCCTCGACGTGATG | Forward:GAAGCAAGGAAACCTCCGCAAGAGCGGGCAACAGCCTCGACG<br>Reverse:CTTGACCTCCACATGTCTTCCTTCGTCGAGATAATCCACAT    | Forward:GCAACCGAAGCTACACGAGCAAT<br>Reverse:GCACAAGCCACCTCACATACCACA  |
| TGME49_309200 | CTTTGTTTTACGAAGATTAG | Forward:ACGGAGGAGCTCAATGCAGCAGCGCCTTTGTTTTACGAAGAT<br>Reverse:TCAATCCCGTCGTACCATTTCTCTGCCATCTTCCACTCCCCTA  | Forward:ATCCGCTTCCACATTCGACTCAG<br>Reverse:TCCCCACGCACCTCTTCACAG     |
| TGME49_248450 | CCTGCCTCCATTCCCTTGAG | Forward:GAGTGCTCTGTGTACACTTCAGGTGCCCTGCCTCCATTCCCT<br>Reverse:CTACCTTCCGAATATCGGAGAGGCCGGTTGTTTGTCCGCTC    | Forward:CGGCCTTCGGCGAGACTTCC<br>Reverse:GGTGCTTATTGTGCGACAGATTGG     |
| TGME49_236640 | AAGAGAACGGGAGCACTTGA | Forward:CTGCGTATTCCAGGCACGGCGGCGCAAGAGAACGGGAGCACT<br>Reverse:TCCGCACCTGCCCTCAGCCTTTTCCCATACGCCTTCCATCA    | Forward:TACGAAGCATCGACGAGCCGTTTG<br>Reverse:TCCGCACCTGCCCTCAGCCT     |
| TGME49_273150 | AGTTGCTGAAGCAAACGTGA | Forward:GGCAAGCGCATGCACCACGCGGTCGAGTTGCTGAAGCAAACG<br>Reverse:TCCCCGCCTGCTCCTCTGTCCGCATGTCGAGACGCTCCATCA   | Forward:GGAGTCTCCGCTGACTCTGTTCGC<br>Reverse:TCATTTCTGCTTATCCGCCGTTTT |

**Table S2: Primers used in the construction of the *zfp* genes knock-out strains.**

| Gene          | sgRNA                | KO-primers (5' -3' )                                                   | U5-Gibson-primers (5'-3')                                              | U3-Gibson-primers (5' -3' )                                           |
|---------------|----------------------|------------------------------------------------------------------------|------------------------------------------------------------------------|-----------------------------------------------------------------------|
| TGME49_285190 | GTGCGAAGCTGCAAGTGAAG | Forward: ACTGACGACGCTGCGTACAACCA<br>Reverse: GCCACTAGCCACCCACGAATAGG   | Forward: GACCTCATACCGCCTCCACTTCTC<br>Reverse: TGCTGTTGTTGTTCCCCATTTC   | Forward: CGATCCAGAAACAACGCAGCAA<br>Reverse: TGTCCAGAGTCAGGGACATCCACA  |
| TGME49_248270 | GACTGGCGAAGAGAAGACGA | Forward: GTGCAGGAAACCAGAAGGGTCG<br>Reverse: GCAACAGGGGTGTTGCGGGAG      | Forward: TGGTTCCTTTATTCGCCCTTGGT<br>Reverse: GCAGATACACTTGGCTTTCCTCCC  | Forward: GTTCCCCTTCTCGCCTGGTCG<br>Reverse: CCGTTCCTTCACTAGCCCTTTCA    |
| TGME49_260870 | GCGAAGCTCCGCGACAGTCG | Forward: CCTCCCGCCCGTCAGGTCAT<br>Reverse: CGCAGAGCGGCAACATTCTTCAA      | Forward: CCCAGGTGGACGGAGATGTTGC<br>Reverse: TGCGGAAGTTTCTTGGTGTGATG    | Forward: GAAATGGATTTTCCTGCCTTTCGC<br>Reverse: CGCCACCGTCGGATCTCAAC    |
| TGME49_255310 | GGTCGACATAGACTCGGAGG | Forward: CCGCATTCCTTCTCCTCACC<br>Reverse: GCGACGAAGGCGTTCTGGTG         | Forward: TGAGGCTCATCGCTGGATATTTTG<br>Reverse: GGGAGGCTGTGGCTCGTCT      | Forward: GACGAAGCGGAAGCAGGACATC<br>Reverse: AAACCACCTTCTCCAGGAACGACA  |
| TGME49_309200 | GGCGCGGTCCATCCTGGTGG | Forward: CGACTTCCACTGGGTCTTCGTACC<br>Reverse: CCAGGCAGCGAACCATCAGC     | Forward: AGGCATGTTCACTCGCACAGGTT<br>Reverse: CGCTCGTAGGCGATGGAAGG      | Forward: GGCCTCGATGGGGTCTTATTGG<br>Reverse: CCGAAGGAAAAGTCAGCGTGGTG   |
| TGME49_248450 | GTGTCGTCCTGTACTTCGTG | Forward: TTCTGTCGATTTCTTTGCTGTGCG<br>Reverse: CATGGCGTGATGGACCTGTCTG   | Forward: GAAGGTGCCCTTTTCACCAAACC<br>Reverse: CGGCGTACCGGAGCTATCCA      | Forward: TTCTTGCTTGGATGGTCAGATGGC<br>Reverse: CCTTGAAAATTGTTGGCAGGGTG |
| TGME49_236640 | GCTGCCGCTCCTGACATACG | Forward: GCTACGGCTGGTTTATTCTCGGTG<br>Reverse: CGTCTTCCTTCTTGCCTTTGCTTC | Forward: AGGAAAAGCTGAGGATTTTCGTGC<br>Reverse: CTCGCCGTAGAGTGTCTGTTGTGG | Forward: CTTGCCCATTTTGTGGTGTTCG<br>Reverse: CGCAGTCAATTTGCTTTTGGTCTC  |
| TGME49_273150 | GCTGGTGCCTGACCAGGCTC | Forward: GCTTGGTCGAGTGTCTCCTCCG<br>Reverse: CCGATCCTTTCGTTCTGCGTCTT    | Forward: AGAAACTCCGCCACGGTTCTG<br>Reverse: TCCCTCCCTGCTGTCTCTCC        | Forward: CGGCTCGTCTGCTTCCTGTCTT<br>Reverse: GAGCTTTCCTGCGACGGGACT     |
